# Supplementary material for: A metabolomic and pharmacokinetic study on the mechanism underlying the lipid-lowering effect of orally administered berberine
Source: Royal Society of Chemistry journal article supplement (doi:10.1039/c4mb00500g), 2014-11-06
Supplement: c4mb00500g3.pdf [file c4mb00500g3.pdf]

## Supplementary material\_Tables

### Tables include:

**Table S1** Normalized peak areas of serum metabolites in the normal control, hyperlipidemic hamsters (HF) , and berberine treated hamsters

**Table S2** The amount of bile acids in hamsters gall bladder

**Table S3** The amount of bile acids in gut content of hamsters

**Table S1 Normalized peak areas of serum metabolites in the normal control, hyperlipidemic hamsters , and berberine treated hamsters (n=5)**

| Identified compounds      | Normal controls |   |         | Hyperlipidaemic hamsters |   |           | Hyperlipidaemic hamsters treated with berberine |   |            |
|---------------------------|-----------------|---|---------|--------------------------|---|-----------|-------------------------------------------------|---|------------|
|                           | Mean            | ± | SD      | Mean                     | ± | SD        | Mean                                            | ± | SD         |
| Tricosanoic acid          | 35464           | ± | 11177   | 77947                    | ± | 28377**   | 76785                                           | ± | 58248*     |
| Decanoic acid             | 117981          | ± | 60711   | 530569                   | ± | 202049**  | 424731                                          | ± | 302975     |
| Monooleoylglycerol        | 1275082         | ± | 500640  | 6521185                  | ± | 2463551** | 5482852                                         | ± | 3280491    |
| 9-Octadecenoic acid       | 229072          | ± | 78352   | 2322880                  | ± | 572764**  | 1626411                                         | ± | 872112**†† |
| 9,12-Octadecadienoic acid | 355574          | ± | 73804   | 3788512                  | ± | 978330**  | 2524575                                         | ± | 118332**†† |
| Teradecanoic acid         | 1704975         | ± | 996442  | 22989500                 | ± | 5937818** | 18339466                                        | ± | 11775625†† |
| Lauric acid               | 633871          | ± | 143890  | 33785333                 | ± | 4883372** | 24439933                                        | ± | 8194419**† |
| Octadecanoic acid         | 525568          | ± | 55917   | 2492915                  | ± | 432841*   | 1103802                                         | ± | 933060**†  |
| 9-hexadecenoic acid       | 9968538         | ± | 2103638 | 7262175                  | ± | 800781*   | 10021778                                        | ± | 6080046    |
| Tetracosanoic acid        | 74006           | ± | 29555   | 193621                   | ± | 67782**   | 165746                                          | ± | 137190*    |
| Hydroxyproline            | 1605215         | ± | 265701  | 2504633                  | ± | 436325**  | 1993845                                         | ± | 713611     |
| Valine                    | 15952472        | ± | 6366152 | 25673800                 | ± | 7277468*  | 19110900                                        | ± | 2097260†   |
| Proline                   | 18145100        | ± | 3611177 | 30500083                 | ± | 3867550*  | 21874115                                        | ± | 7231196††  |
| Cholesterol               | 13692017        | ± | 2323996 | 51852733                 | ± | 8015496** | 40857114                                        | ± | 31165588*  |
| Allantoin                 | 146641          | ± | 49706   | 304867                   | ± | 80331**   | 237899                                          | ± | 73914      |
| Succinic acid             | 954024          | ± | 390828  | 470967                   | ± | 231280*   | 610560                                          | ± | 377180     |
| Ornithine                 | 13799967        | ± | 3821767 | 20872717                 | ± | 2669624** | 13446636                                        | ± | 5104305†   |
| Arginine                  | 2411950         | ± | 470934  | 3555860                  | ± | 495637**  | 2359985                                         | ± | 593510††   |
| Galacturonic acid         | 395804          | ± | 112573  | 569147                   | ± | 168617*   | 425518                                          | ± | 115239††   |
| myo-Inositol-phosphate    | 2582162         | ± | 297636  | 4318088                  | ± | 816224**  | 3615100                                         | ± | 2084208    |
| Erythronic acid           | 145240          | ± | 68750   | 292096                   | ± | 159961**  | 235642                                          | ± | 175921**†  |
| Cholic acid               | 96270           | ± | 30943   | 128356                   | ± | 85339     | 592847                                          | ± | 393184**†  |

Statistical significance relative to normal control group, \*p < 0.05; \*\*p<0.01 (One-way ANOVA; mean ± SD);

†, ††: Statistical significance relative to HF control group, †p < 0.05; ††p<0.01 (One-way ANOVA ; mean ± SD).

**Table S2 The amount of bile acids in hamsters gall bladder**

| Bile acids                               | <b>C</b><br>(Mean ± SE) | <b>CB</b><br>(Mean ± SE) | <b>HF</b><br>(Mean ± SE) | <b>HFB</b><br>(Mean ± SE) |
|------------------------------------------|-------------------------|--------------------------|--------------------------|---------------------------|
| <b>Concentration (mM)</b>                |                         |                          |                          |                           |
| GCA                                      | 9.454 ± 1.594           | 16.073 ± 3.584*          | 11.992 ± 2.263           | 16.583 ± 4.625            |
| TCA                                      | 7.169 ± 1.104           | 12.281 ± 3.566*          | 7.116 ± 1.113            | 14.304 ± 7.737            |
| CA                                       | 3.928 ± 0.794           | 3.677 ± 1.243            | 5.230 ± 1.577            | 1.565 ± 0.556**           |
| DCA+CDCA                                 | 0.244 ± 0.074           | 0.124 ± 0.064*           | 0.462 ± 0.091            | 0.070 ± 0.045**           |
| UDCA                                     | 0.101 ± 0.034           | 0.180 ± 0.072            | 0.615 ± 0.204            | 0.155 ± 0.083*            |
| LCA                                      | 0.018 ± 0.006           | 0.033 ± 0.005**          | 0.085 ± 0.039            | 0.090 ± 0.049             |
| <b>Amount (nM)</b>                       |                         |                          |                          |                           |
| GCA                                      | 113.83 ± 66.88          | 490.09 ± 215.75*         | 193.30 ± 71.17           | 500.37 ± 280.75*          |
| TCA                                      | 86.02 ± 52.36           | 359.55 ± 180.86**        | 114.14 ± 38.07           | 438.20 ± 322.42*          |
| CA                                       | 45.61 ± 23.45           | 97.47 ± 55.68            | 84.15 ± 35.13            | 44.08 ± 21.54             |
| DCA+CDCA                                 | 2.86 ± 1.73             | 2.92 ± 1.46              | 7.38 ± 2.49              | 1.98 ± 1.41               |
| UDCA                                     | 1.17 ± 0.65             | 4.62 ± 3.09              | 9.84 ± 4.05              | 4.28 ± 2.11               |
| LCA                                      | 0.20 ± 0.10             | 0.94 ± 0.52              | 1.32 ± 0.57              | 2.62 ± 1.59               |
| <b>Total weight of gall bladder (mg)</b> |                         |                          |                          |                           |
|                                          | 12.2 ± 7.4              | 33.5 ± 15.16             | 14.8 ± 6.18              | 29.17 ± 11.99 *           |

\*, p<0.05; \*\*, p<0.01, relative to the controls. C, Hamsters control; CB, Control+BBR (100mg/kg, i.g.); HF, Hamsters with high fatty diet; HFB, Hamsters with high fatty diet+BBR (100mg/kg, i.g.).

CA, cholic acid; GCA, glycocholic acid; TCA, Taurocholic acid; DCA, deoxycholic acid; CDCA, chenodeoxycholic acid; UDCA, Ursodeoxycholic acid; LCA, lithocholic acid.

**Table S3 The amount of bile acids in gut content of hamsters**

| Bile acids                             | C               |  | CB                 |  | HF               |  | HFB                 |  |
|----------------------------------------|-----------------|--|--------------------|--|------------------|--|---------------------|--|
|                                        | (Mean ± SE)     |  | (Mean ± SE)        |  | (Mean ± SE)      |  | (Mean ± SE)         |  |
| <b>Concentration (mM)</b>              |                 |  |                    |  |                  |  |                     |  |
| GCA                                    | /               |  | 0.50 ± 0.19        |  | 0.96 ± 0.37      |  | /                   |  |
| TCA                                    | /               |  | /                  |  | /                |  | /                   |  |
| CA                                     | 1.13 ± 0.30     |  | 0.71 ± 0.71        |  | 1.64 ± 0.18      |  | 2.31 ± 1.64         |  |
| DCA+CDCA                               | 388.03 ± 53.17  |  | 590.48 ± 141.10 *  |  | 670.21 ± 43.60   |  | 1075.21 ± 445.73    |  |
| UDCA                                   | 31.91 ± 4.14    |  | 55.13 ± 16.14 *    |  | 79.23 ± 6.75     |  | 88.84 ± 46.31       |  |
| LCA                                    | 347.55 ± 64.58  |  | 304.49 ± 41.80     |  | 731.80 ± 23.93   |  | 908.86 ± 374.32     |  |
| <b>Amount (nM)</b>                     |                 |  |                    |  |                  |  |                     |  |
| GCA                                    | /               |  | 1.20 ± 0.40        |  | 2.01 ± 0.65      |  | /                   |  |
| TCA                                    | /               |  | /                  |  | /                |  | /                   |  |
| CA                                     | 1.89 ± 0.46     |  | 1.74 ± 1.79        |  | 3.61 ± 0.92      |  | 6.13 ± 3.86         |  |
| DCA+CDCA                               | 653.44 ± 132.14 |  | 1456.56 ± 465.97 * |  | 1459.80 ± 222.76 |  | 3036.79 ± 1373.39 * |  |
| UDCA                                   | 53.85 ± 11.59   |  | 136.01 ± 51.13 *   |  | 171.61 ± 17.01   |  | 255.69 ± 151.28     |  |
| LCA                                    | 578.75 ± 102.15 |  | 742.89 ± 136.69    |  | 1590.09 ± 181.09 |  | 2585.63 ± 1229.71   |  |
| <b>Total weight of gut content (g)</b> |                 |  |                    |  |                  |  |                     |  |
|                                        | 1.68 ± 0.15     |  | 2.44 ± 0.26 **     |  | 2.17 ± 0.25      |  | 2.80 ± 0.39 *       |  |

/, below limit of detection. \*, p<0.05, relative to the controls. C, Hamsters control; CB, Control+BBR (100mg/kg, i.g.); HF, Hamsters with high fatty diet; HFB, Hamsters with high fatty diet+BBR (100mg/kg, i.g.).

CA, cholic acid; GCA, glycocholic acid; TCA, Taurocholic acid; DCA, deoxycholic acid; CDCA, chenodeoxycholic acid; UDCA, Ursodeoxycholic acid; LCA, lithocholic acid.
